# Supplementary material for: Sampling of basement fluids via Circulation Obviation Retrofit Kits (CORKs) for dissolved gases, fluid fixation at the seafloor, and the characterization of organic carbon
Source: PubMed Central journal article supplement (PMC7482021; doi:10.1016/j.mex.2020.101033), 2020-08-15
Supplement: mmc1.pdf [file mmc1.pdf]

Not draw to scale.

|              |                     |
|--------------|---------------------|
| <b>TITLE</b> | Bag_sampler_3D_plot |
|--------------|---------------------|

|                |                   |
|----------------|-------------------|
| <b>PART NO</b> | Schematic Drawing |
|----------------|-------------------|

|                 |     |
|-----------------|-----|
| <b>REVISION</b> | 1.0 |
|-----------------|-----|

|                 |                  |
|-----------------|------------------|
| <b>DESIGNER</b> | Fan-Chieh Chuang |
|-----------------|------------------|

|                 |                   |
|-----------------|-------------------|
| <b>ENGINEER</b> | Chih-Chiang Hsieh |
|-----------------|-------------------|

**NOTES**

Not draw to scale.

THE INFORMATION AND/OR MATERIAL IN THIS DOCUMENT IS THE PROPERTY OF AND RESTRICTED INFORMATION AND/OR MATERIAL OF THE AUTHOR. THIS INFORMATION MAY NOT BE USED, REPRODUCED, PUBLISHED OR DISCLOSED TO OTHERS WITHOUT WRITTEN AUTHORIZATION. IT IS TO BE USED ONLY FOR MANUFACTURING ITEMS SPECIFIED WITHIN THE DOCUMENT.
